# Supplementary material
Source: PubMed Central journal article supplement (PMC4845101)
Supplement: NIHMS747009-supplement-1.pdf [file NIHMS747009-supplement-1.pdf]

SI consists of Supplementary Text, Supplementary Fig. 1 (containing un-cropped Western blot scans), and Supplementary Tables 1 and 2 in Excel.
