# Supplementary material
Source: PubMed Central journal article supplement (PMC4845101)
Supplement: NIHMS747009-supplement-SF1.pdf [file NIHMS747009-supplement-SF1.pdf]

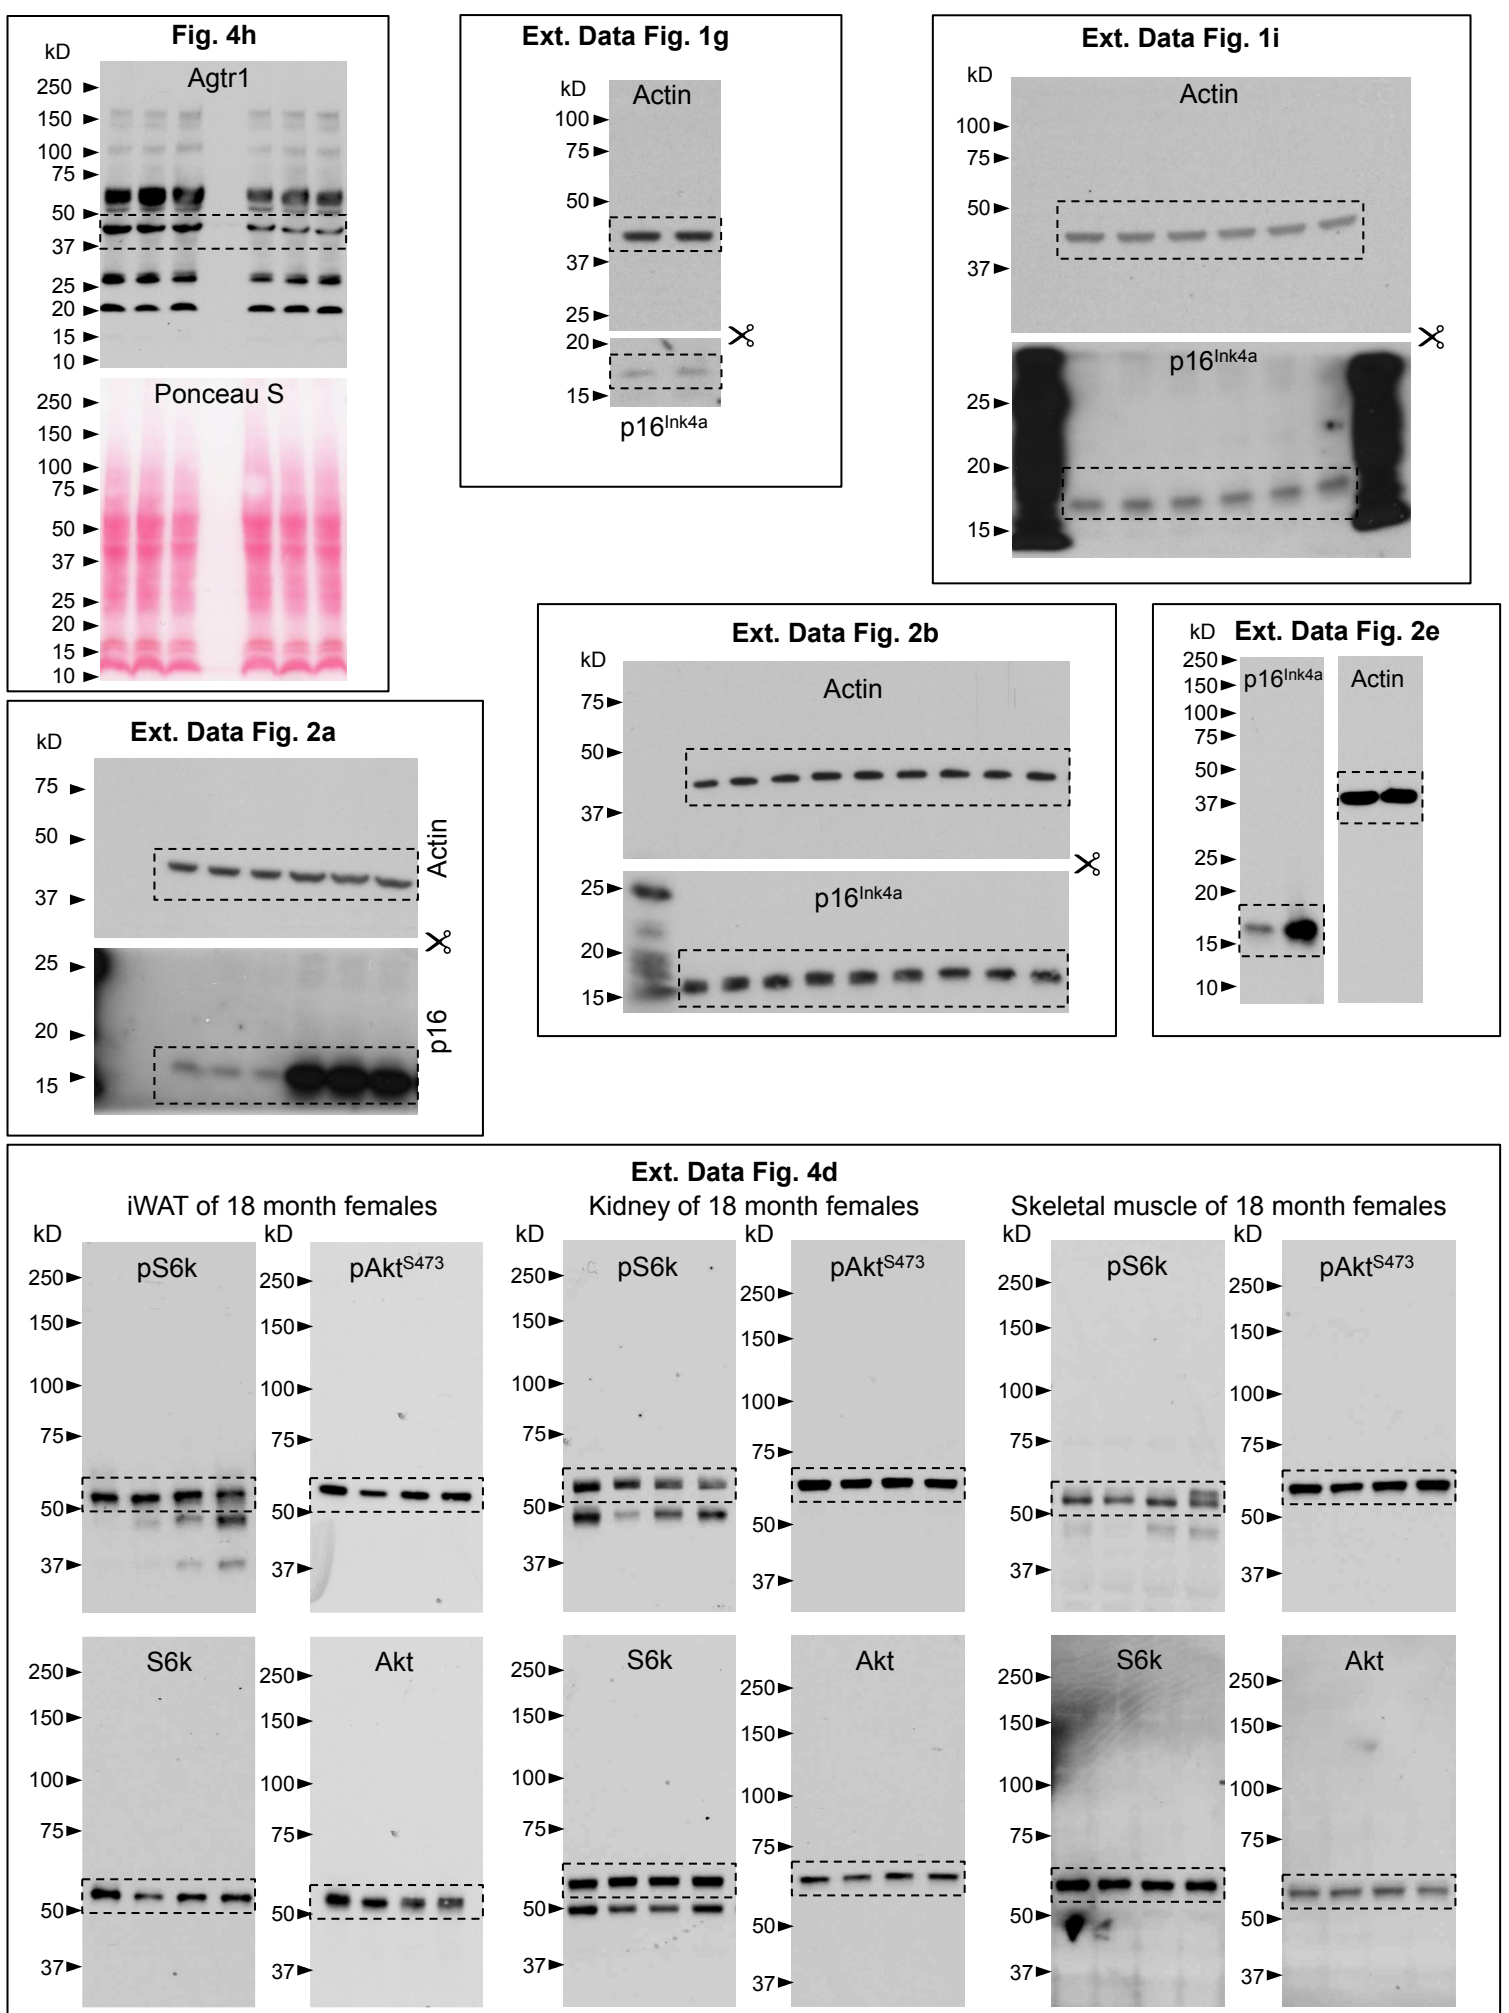

**Supplementary Figure 1:** Full scans of Western blot data presented in Fig. 4h, Extended Data Fig. 1g, i, Extended Data Fig. 2a, b, e, and Extended Data Fig. 4d. Highlighted areas are shown in main figures.
